# Supplementary material for: NeuroSC: Exploring Neurodevelopment via Spatiotemporal Collation of Anatomical Networks
Source: bioRxiv preprint, doi:10.1101/2024.08.27.609993, version 3 (2025-05-27)
Supplement: Supplemental Table 7 [file 609993_file09.xlsx]

## Sheet: L1_0hr
L1_0hr
		iter23	iter22	iter21	iter20	iter19	iter18	iter17	iter16	iter15	iter14	iter13	iter12	iter11	iter10	iter9	iter8	iter7	iter6	iter5	iter4	iter3	iter2	iter1
												SABD	SABD	SABD	SABD	SABD	SABD	SABD	SABD	SABD	SABD	SABD	SABD	SABD
									SABD	SABD	SABD
									AIAR	AIAR	AIAR
									ASGR	ASGR	ASGR	ASGR	ASGR	ASGR	ASGR	ASGR	ASGR	ASGR	ASGR	ASGR	ASGR	ASGR	ASGR	ASGR
									ASJR	ASJR	ASJR
									ASKR	ASKR	ASKR
									ADLR	ADLR	ADLR
									AIMR	AIMR	AIMR		AIAR	AIAR	AIAR	AIAR	AIAR	AIAR	AIAR	AIAR	AIAR	AIAR	AIAR	AIAR
									PVQR	PVQR	PVQR
				ALA	ALA	ALA	ALA	ALA				AIAR	ASJR	ASJR	ASJR	ASJR	ASJR	ASJR	ASJR	ASJR	ASJR	ASJR	ASJR	ASJR
				SABD	SABD	SABD	SABD	SABD				ASJR
				AIAR	AIAR	AIAR	AIAR	AIAR				ASKR	ASKR	ASKR	ASKR	ASKR	ASKR	ASKR	ASKR	ASKR	ASKR	ASKR	ASKR	ASKR
				AUAR	AUAR	AUAR	AUAR	AUAR				PVQR	PVQR
				AWAR	AWAR	AWAR	AWAR	AWAR				ADLR		PVQR	PVQR	PVQR	PVQR	PVQR	PVQR	PVQR	PVQR	PVQR	PVQR	PVQR
				AIBR	AIBR	AIBR	AIBR	AIBR				AIMR
				AWBR	AWBR	AWBR	AWBR	AWBR					ADLR	ADLR	ADLR	ADLR	ADLR	ADLR	ADLR	ADLR	ADLR	ADLR	ADLR	ADLR
				AWCR	AWCR	AWCR	AWCR	AWCR
				AFDR	AFDR	AFDR	AFDR	AFDR					AIMR	AIMR	AIMR	AIMR	AIMR	AIMR	AIMR	AIMR	AIMR	AIMR	AIMR	AIMR
				ASER	ASER	ASER	ASER	ASER
				ADFR	ADFR	ADFR	ADFR	ADFR
				RMGR	RMGR	RMGR	RMGR	RMGR
				ASGR	ASGR	ASGR	ASGR	ASGR				ALA	ALA	ALA	ALA	ALA	ALA	ALA	ALA	ALA	ALA	ALA	ALA	ALA
				ASHR	ASHR	ASHR	ASHR	ASHR			ALA
				ASIR	ASIR	ASIR	ASIR	ASIR			AUAR	AUAR	AUAR	AUAR	AUAR	AUAR	AUAR	AUAR	AUAR	AUAR	AUAR	AUAR	AUAR	AUAR
				ASJR	ASJR	ASJR	ASJR	ASJR			AIBR
				ASKR	ASKR	ASKR	ASKR	ASKR				AIBR	AIBR	AIBR	AIBR	AIBR	AIBR	AIBR	AIBR	AIBR	AIBR	AIBR	AIBR	AIBR
				ADLR	ADLR	ADLR	ADLR	ADLR
				AIMR	AIMR	AIMR	AIMR	AIMR	ALA	ALA
				PVQR	PVQR	PVQR	PVQR	PVQR	AUAR	AUAR	RMGR	RMGR	RMGR	RMGR	RMGR	RMGR	RMGR	RMGR	RMGR	RMGR	RMGR	RMGR	RMGR	RMGR
				AIYR	AIYR	AIYR	AIYR	AIYR	AWAR	AWAR
				AIZR	AIZR	AIZR	AIZR	AIZR	AIBR	AIBR	AFDR	AFDR	AFDR	AFDR	AFDR	AFDR	AFDR	AFDR	AFDR	AFDR	AFDR	AFDR	AFDR	AFDR
									AWBR	AWBR
									AWCR	AWCR
		ALA	ALA						AFDR	AFDR			AWAR	AWAR	AWAR	AWAR	AWAR	AWAR	AWAR	AWAR	AWAR	AWAR	AWAR	AWAR
		SABD	SABD						ASER	ASER		AWAR
		AIAL	AIAL						ADFR	ADFR		AWBR	AWBR	AWBR	AWBR	AWBR	AWBR	AWBR	AWBR	AWBR	AWBR	AWBR	AWBR	AWBR
		AUAL	AUAL						RMGR	RMGR		ADFR
		AWAL	AWAL						ASHR	ASHR	AWAR		ADFR	ADFR	ADFR	ADFR	ADFR	ADFR	ADFR	ADFR	ADFR	ADFR	ADFR	ADFR
		AIBL	AIBL						ASIR	ASIR	AWBR
		AWBL	AWBL						AIYR	AIYR	AWCR	AWCR	AWCR	AWCR	AWCR	AWCR	AWCR	AWCR	AWCR	AWCR	AWCR	AWCR	AWCR	AWCR
		AWCL	AWCL						AIZR	AIZR	ASER	ASIR
		AFDL	AFDL								ADFR		ASIR	ASIR	ASIR	ASIR	ASIR	ASIR	ASIR	ASIR	ASIR	ASIR	ASIR	ASIR
		ASEL	ASEL								ASHR
		ADFL	ADFL								ASIR	ASHR	ASHR	ASHR	ASHR	ASHR	ASHR	ASHR	ASHR	ASHR	ASHR	ASHR	ASHR	ASHR
		ASGL	ASGL								AIYR
		ASHL	ASHL								AIZR	ASER	ASER	ASER	ASER	ASER	ASER	ASER	ASER	ASER	ASER	ASER	ASER	ASER
		ASIL	ASIL									AIYR
		ASJL	ASJL										AIYR	AIYR	AIYR	AIYR	AIYR	AIYR	AIYR	AIYR	AIYR	AIYR	AIYR	AIYR
		ASKL	ASKL
		ADLL	ADLL									AIZR	AIZR	AIZR	AIZR	AIZR	AIZR	AIZR	AIZR	AIZR	AIZR	AIZR	AIZR	AIZR
		AIML	AIML
		AINL	AINL
		PVQL	PVQL
		AIYL	AIYL
		AIZL	AIZL
		AIAR	AIAR										AIAL	AIAL	AIAL	AIAL	AIAL	AIAL	AIAL	AIAL	AIAL	AIAL	AIAL	AIAL
		AUAR	AUAR
		AWAR	AWAR										AWAL	AWAL	AWAL	AWAL	AWAL	AWAL	AWAL	AWAL	AWAL	AWAL	AWAL	AWAL
		AIBR	AIBR
		AWBR	AWBR									AIAL	ASGL	ASGL	ASGL	ASGL	ASGL	ASGL	ASGL	ASGL	ASGL	ASGL	ASGL	ASGL
		AWCR	AWCR									AWAL
		AFDR	AFDR					AIAL	AIAL	AIAL	AIAL	ASGL	ASJL	ASJL	ASJL	ASJL	ASJL	ASJL	ASJL	ASJL	ASJL	ASJL	ASJL	ASJL
		ASER	ASER					AWAL	AWAL	AWAL	AWAL	ASJL
		ADFR	ADFR					ASGL	ASGL	ASGL	ASGL	ASKL	ASKL	ASKL	ASKL	ASKL	ASKL	ASKL	ASKL	ASKL	ASKL	ASKL	ASKL	ASKL
		BAGR	BAGR					ASJL	ASJL	ASJL	ASJL	ADLL
		RMGR	RMGR					ASKL	ASKL	ASKL	ASKL	AIML	ADLL	ADLL	ADLL	ADLL	ADLL	ADLL	ADLL	ADLL	ADLL	ADLL	ADLL	ADLL
		ASGR	ASGR					ADLL	ADLL	ADLL	ADLL	PVQL
		ASHR	ASHR					AIML	AIML	AIML	AIML		PVQL	PVQL	PVQL	PVQL	PVQL	PVQL	PVQL	PVQL	PVQL	PVQL	PVQL	PVQL
		ASIR	ASIR					PVQL	PVQL	PVQL	PVQL
		ASJR	ASJR					ADFL	ADFL	ADFL	ADFL		AIML	AIML	AIML	AIML	AIML	AIML	AIML	AIML	AIML	AIML	AIML	AIML
		ASKR	ASKR		AIAL	AIAL	AIAL	AIYL	AIYL	AIYL	AIYL
		ADLR	ADLR		AUAL	AUAL	AUAL	AIZL	AIZL	AIZL	AIZL
		AIMR	AIMR		AWAL	AWAL	AWAL	AWBL	AWBL	AWBL	AWBL
		AINR	AINR		AIBL	AIBL	AIBL	ASEL	ASEL	ASEL	ASEL		ADFL	ADFL	ADFL	ADFL	ADFL	ADFL	ADFL	ADFL	ADFL	ADFL	ADFL	ADFL
		PVQR	PVQR		AWBL	AWBL	AWBL	ASIL	ASIL	ASIL	ASIL	ADFL
		AIYR	AIYR		AWCL	AWCL	AWCL					AIYL	AIYL	AIYL	AIYL	AIYL	AIYL	AIYL	AIYL	AIYL	AIYL	AIYL	AIYL	AIYL
		AIZR	AIZR		AFDL	AFDL	AFDL					AIZL
					ASEL	ASEL	ASEL						AIZL	AIZL	AIZL	AIZL	AIZL	AIZL	AIZL	AIZL	AIZL	AIZL	AIZL	AIZL
				AIAL	ADFL	ADFL	ADFL
				AUAL	ASGL	ASGL	ASGL
				AWAL	ASHL	ASHL	ASHL							AWBL	AWBL	AWBL	AWBL	AWBL	AWBL	AWBL	AWBL	AWBL	AWBL	AWBL
				AIBL	ASIL	ASIL	ASIL					AWBL	AWBL
				AWBL	ASJL	ASJL	ASJL					ASEL	ASEL	ASEL	ASEL	ASEL	ASEL	ASEL	ASEL	ASEL	ASEL	ASEL	ASEL	ASEL
				AWCL	ASKL	ASKL	ASKL					ASIL
				AFDL	ADLL	ADLL	ADLL						ASIL	ASIL	ASIL	ASIL	ASIL	ASIL	ASIL	ASIL	ASIL	ASIL	ASIL	ASIL
				ASEL	AIML	AIML	AIML
				ADFL	AINL	AINL	AINL
				ASGL	PVQL	PVQL	PVQL				ASHL	ASHL	ASHL	ASHL	ASHL	ASHL	ASHL	ASHL	ASHL	ASHL	ASHL	ASHL	ASHL	ASHL
				ASHL	AIYL	AIYL	AIYL
				ASIL	AIZL	AIZL	AIZL				AUAL	AUAL	AUAL	AUAL	AUAL	AUAL	AUAL	AUAL	AUAL	AUAL	AUAL	AUAL	AUAL	AUAL
				ASJL	AINR	AINR	AINR
				ASKL				AUAL	AUAL	AUAL
				ADLL				AIBL	AIBL	AIBL	AIBL	AIBL	AIBL	AIBL	AIBL	AIBL	AIBL	AIBL	AIBL	AIBL	AIBL	AIBL	AIBL	AIBL
				AIML				AWCL	AWCL	AWCL
				AINL				AFDL	AFDL	AFDL	AFDL	AFDL	AFDL	AFDL	AFDL	AFDL	AFDL	AFDL	AFDL	AFDL	AFDL	AFDL	AFDL	AFDL
				PVQL				ASHL	ASHL	ASHL
				AIYL				AINL	AINL	AINL	AINL	AINL	AINL	AINL	AINL	AINL	AINL	AINL	AINL	AINL	AINL	AINL	AINL	AINL
				AIZL				AINR	AINR	AINR	AINR
				BAGR								AINR	AINR	AINR	AINR	AINR	AINR	AINR	AINR	AINR	AINR	AINR	AINR	AINR
				AINR
											AWCL	AWCL	AWCL	AWCL	AWCL	AWCL	AWCL	AWCL	AWCL	AWCL	AWCL	AWCL	AWCL	AWCL
					BAGR	BAGR	BAGR	BAGR	BAGR	BAGR	BAGR	BAGR	BAGR	BAGR	BAGR	BAGR	BAGR	BAGR	BAGR	BAGR	BAGR	BAGR	BAGR	BAGR

## Sheet: L1_5hr
L1_5hr
			iter23	iter22	iter21	iter20	iter19	iter18	iter17	iter16	iter15	iter14	iter13	iter12	iter11	iter10	iter9	iter8	iter7	iter6	iter5	iter4	iter3	iter2	iter1
						ALA	ALA	ALA	ALA	ALA	ALA	ALA	ALA	ALA	ALA	ALA	ALA	ALA	ALA	ALA	ALA	ALA	ALA	ALA	ALA	ALA
														BAGL	BAGL	BAGL	BAGL	BAGL	BAGL	BAGL	BAGL	BAGL	BAGL	BAGL	BAGL
											BAGL	BAGL	BAGL
											AIBR	AIBR	AIBR	AIBR	AIBR	AIBR	AIBR	AIBR	AIBR	AIBR	AIBR	AIBR	AIBR	AIBR	AIBR
															AWAR	AWAR	AWAR	AWAR	AWAR	AWAR	AWAR	AWAR	AWAR	AWAR	AWAR
														AWAR
														AWBR
													AWAR		AWBR	AWBR	AWBR	AWBR	AWBR	AWBR	AWBR	AWBR	AWBR	AWBR	AWBR
													AWBR
												AWAR	ADLR	ADLR	ADLR	ADLR	ADLR	ADLR	ADLR	ADLR	ADLR	ADLR	ADLR	ADLR	ADLR
												AWBR
												ADLR
							BAGL	BAGL	BAGL	BAGL		ADFR		ADFR	ADFR	ADFR	ADFR	ADFR	ADFR	ADFR	ADFR	ADFR	ADFR	ADFR	ADFR
							AIBR	AIBR	AIBR	AIBR		AIYR	ADFR
							AWAR	AWAR	AWAR	AWAR	AWAR	AIZR	AIYR	AIYR	AIYR	AIYR	AIYR	AIYR	AIYR	AIYR	AIYR	AIYR	AIYR	AIYR	AIYR
							AWBR	AWBR	AWBR	AWBR	AWBR		AIZR
							ADFR	ADFR	ADFR	ADFR	ADLR			AIZR	AIZR	AIZR	AIZR	AIZR	AIZR	AIZR	AIZR	AIZR	AIZR	AIZR	AIZR
							ADLR	ADLR	ADLR	ADLR	ADFR
							AIYR	AIYR	AIYR	AIYR	AIYR
							AIZR	AIZR	AIZR	AIZR	AIZR
							ASJR	ASJR	ASJR	ASJR	ASJR		ASJR	ASJR	ASJR	ASJR	ASJR	ASJR	ASJR	ASJR	ASJR	ASJR	ASJR	ASJR	ASJR
							ASKR	ASKR	ASKR	ASKR	ASKR
							AIMR	AIMR	AIMR	AIMR	AIMR	ASJR		ASKR	ASKR	ASKR	ASKR	ASKR	ASKR	ASKR	ASKR	ASKR	ASKR	ASKR	ASKR
							PVQR	PVQR	PVQR	PVQR	PVQR	ASKR	ASKR
							SMBVR	SMBVR	SMBVR	SMBVR		AIMR	AIMR	AIMR	AIMR	AIMR	AIMR	AIMR	AIMR	AIMR	AIMR	AIMR	AIMR	AIMR	AIMR
						BAGL						PVQR
						AWAR							PVQR	PVQR	PVQR	PVQR	PVQR	PVQR	PVQR	PVQR	PVQR	PVQR	PVQR	PVQR	PVQR
						AIBR
						AWBR
						ADFR					SMBVR	SMBVR	SMBVR	SMBVR	SMBVR	SMBVR	SMBVR	SMBVR	SMBVR	SMBVR	SMBVR	SMBVR	SMBVR	SMBVR	SMBVR
						ASJR
						ASKR
						ADLR
						AIMR
						PVQR
						SMBVR
						AIYR								AIAR	AIAR	AIAR	AIAR	AIAR	AIAR	AIAR	AIAR	AIAR	AIAR	AIAR	AIAR
						AIZR						AIAR	AIAR
						AIAR						ASGR	ASGR	ASGR	ASGR	ASGR	ASGR	ASGR	ASGR	ASGR	ASGR	ASGR	ASGR	ASGR	ASGR
						AUAR		AIAR	AIAR	AIAR	AIAR
						AFDR		ASGR	ASGR	ASGR	ASGR
						ASER		AFDR	AFDR	AFDR	AFDR		AFDR	AFDR	AFDR	AFDR	AFDR	AFDR	AFDR	AFDR	AFDR	AFDR	AFDR	AFDR	AFDR
						BAGR		ASER	ASER	ASER	ASER	AFDR
						ASGR		ASIR	ASIR	ASIR	ASIR	ASER	ASER	ASER	ASER	ASER	ASER	ASER	ASER	ASER	ASER	ASER	ASER	ASER	ASER
					ALA	RIR	AIAR					ASIR
					BAGL	ASIR	AFDR						ASIR	ASIR	ASIR	ASIR	ASIR	ASIR	ASIR	ASIR	ASIR	ASIR	ASIR	ASIR	ASIR
					AIAR		ASER
					AUAR		ASGR					AUAR	AUAR	AUAR	AUAR	AUAR	AUAR	AUAR	AUAR	AUAR	AUAR	AUAR	AUAR	AUAR	AUAR
					AWAR		ASIR					RIR
					AIBR		AUAR	AUAR	AUAR	AUAR	AUAR		RIR	RIR	RIR	RIR	RIR	RIR	RIR	RIR	RIR	RIR	RIR	RIR	RIR
					AWBR		RIR	RIR	RIR	RIR	RIR
					AFDR		BAGR	BAGR	BAGR	BAGR	BAGR
					ASER							BAGR	BAGR	BAGR	BAGR	BAGR	BAGR	BAGR	BAGR	BAGR	BAGR	BAGR	BAGR	BAGR	BAGR
					ADFR
					BAGR
					ASGR
					RIR
					ASIR
					ASJR
					ASKR
					ADLR
					AIMR
					PVQR
					SMBVR
					AIYR
				ALA	AIZR
				BAGL	AINL
				AIAR	AWCR
				AUAR	AINR							AINL	AINL	AINL	AINL	AINL	AINL	AINL	AINL	AINL	AINL	AINL	AINL	AINL	AINL	AINL
				AWAR		AINL	AINL	AINL	AINL	AINL	AINL
				AIBR		AWCR	AWCR	AWCR	AWCR	AWCR	AWCR	AWCR	AWCR	AWCR	AWCR	AWCR	AWCR	AWCR	AWCR	AWCR	AWCR	AWCR	AWCR	AWCR	AWCR	AWCR
				AWBR		AINR	AINR	AINR
				AFDR					AINR	AINR	AINR	AINR	AINR	AINR	AINR	AINR	AINR	AINR	AINR	AINR	AINR	AINR	AINR	AINR	AINR	AINR
				ASER
				ADFR
				BAGR
				ASGR
				RIR
				ASIR
				ASJR
				ASKR
				ADLR
				AIMR
				PVQR
				SMBVR
				AIYR
				AIZR
				AINL
				AWCR
				AINR
				ASHR	ASHR	ASHR	ASHR	ASHR	ASHR	ASHR	ASHR	ASHR	ASHR	ASHR	ASHR	ASHR	ASHR	ASHR	ASHR	ASHR	ASHR	ASHR	ASHR	ASHR	ASHR	ASHR
			ALA
			BAGL
			AINL
			AIAR
			AUAR
			AWAR
			AIBR
			AWBR
			AWCR
			AFDR
			ASER
			ADFR
			BAGR
			ASGR
			ASHR
			RIR
			ASIR
			ASJR
			ASKR
			ADLR
			AIMR
			AINR
			PVQR
			SMBVR
			AIYR
			AIZR
			AIAL
			AUAL
			AWAL
			AIBL
			AWBL
			AWCL
			AFDL
			ASEL
			ADFL
			RMGL
			ASGL
			ASHL
			ASIL
			ASJL
			ASKL
			ADLL
			AIML
			PVQL
			URXL
			AIYL
			AIZL
				AIAL	AIAL
				AUAL	AUAL	AUAL	AUAL	AUAL	AUAL	AUAL	AUAL	AUAL	AUAL	AUAL	AUAL	AUAL	AUAL	AUAL	AUAL	AUAL	AUAL	AUAL	AUAL	AUAL	AUAL
				AWAL	AWAL
				AIBL	AIBL
				AWBL	AWBL
				AWCL	AWCL
				AFDL	AFDL
				ASEL	ASEL
				ADFL	ADFL
				RMGL	RMGL
				ASGL	ASGL
				ASHL	ASHL
				ASIL	ASIL									AIAL	AIAL	AIAL	AIAL	AIAL	AIAL	AIAL	AIAL	AIAL	AIAL	AIAL	AIAL
				ASJL	ASJL								AIAL
				ASKL	ASKL								ASGL	ASGL	ASGL	ASGL	ASGL	ASGL	ASGL	ASGL	ASGL	ASGL	ASGL	ASGL	ASGL
				ADLL	ADLL								ASIL
				AIML	AIML						AIAL	AIAL		ASIL	ASIL	ASIL	ASIL	ASIL	ASIL	ASIL	ASIL	ASIL	ASIL	ASIL	ASIL
				PVQL	PVQL						ASGL	ASGL
				URXL	URXL						ASIL	ASIL
				AIYL	AIYL						ASJL	ASJL	ASJL	ASJL	ASJL	ASJL	ASJL	ASJL	ASJL	ASJL	ASJL	ASJL	ASJL	ASJL	ASJL
				AIZL	AIZL						PVQL	PVQL
						AIAL	AIAL	AIAL	AIAL	AIAL			PVQL	PVQL	PVQL	PVQL	PVQL	PVQL	PVQL	PVQL	PVQL	PVQL	PVQL	PVQL	PVQL
						AWAL	AWAL	AWAL	AWAL	AWAL
						AIBL	AIBL	AIBL	AIBL	AIBL
						AWBL	AWBL	AWBL	AWBL	AWBL
						AWCL	AWCL	AWCL	AWCL	AWCL
						AFDL	AFDL	AFDL	AFDL	AFDL
						ASEL	ASEL	ASEL	ASEL	ASEL
						ADFL	ADFL	ADFL	ADFL	ADFL
						RMGL	RMGL	RMGL	RMGL	RMGL
						ASGL	ASGL	ASGL	ASGL	ASGL
						ASHL	ASHL	ASHL	ASHL	ASHL			AIBL	AIBL	AIBL	AIBL	AIBL	AIBL	AIBL	AIBL	AIBL	AIBL	AIBL	AIBL	AIBL
						ASIL	ASIL	ASIL	ASIL	ASIL
						ASJL	ASJL	ASJL	ASJL	ASJL			AFDL	AFDL	AFDL	AFDL	AFDL	AFDL	AFDL	AFDL	AFDL	AFDL	AFDL	AFDL	AFDL
						ASKL	ASKL	ASKL	ASKL	ASKL			AIYL
						ADLL	ADLL	ADLL	ADLL	ADLL		AIBL		AIYL	AIYL	AIYL	AIYL	AIYL	AIYL	AIYL	AIYL	AIYL	AIYL	AIYL	AIYL
						AIML	AIML	AIML	AIML	AIML		AFDL
						PVQL	PVQL	PVQL	PVQL	PVQL		RMGL	RMGL	RMGL	RMGL	RMGL	RMGL	RMGL	RMGL	RMGL	RMGL	RMGL	RMGL	RMGL	RMGL
						URXL	URXL	URXL	URXL	URXL		URXL
						AIYL	AIYL	AIYL	AIYL	AIYL		AIYL
						AIZL	AIZL	AIZL	AIZL	AIZL		AIZL	AIZL	AIZL	AIZL	AIZL	AIZL	AIZL	AIZL	AIZL	AIZL	AIZL	AIZL	AIZL	AIZL
											AWAL		URXL
											AIBL			URXL	URXL	URXL	URXL	URXL	URXL	URXL	URXL	URXL	URXL	URXL	URXL
											AWBL
											AWCL
											AFDL
											ASEL
											ADFL
											RMGL
											ASHL
											ASKL				AWAL	AWAL	AWAL	AWAL	AWAL	AWAL	AWAL	AWAL	AWAL	AWAL	AWAL
											ADLL			AWAL
											AIML			AWBL	AWBL	AWBL	AWBL	AWBL	AWBL	AWBL	AWBL	AWBL	AWBL	AWBL	AWBL
											URXL		AWAL
											AIYL		AWBL
											AIZL		ADLL	ADLL	ADLL	ADLL	ADLL	ADLL	ADLL	ADLL	ADLL	ADLL	ADLL	ADLL	ADLL
												AWAL
												AWBL		AWCL	AWCL	AWCL	AWCL	AWCL	AWCL	AWCL	AWCL	AWCL	AWCL	AWCL	AWCL
												AWCL	AWCL
												ASEL	ASEL	ASEL	ASEL	ASEL	ASEL	ASEL	ASEL	ASEL	ASEL	ASEL	ASEL	ASEL	ASEL
												ADFL
												ASHL	ASHL	ASHL	ASHL	ASHL	ASHL	ASHL	ASHL	ASHL	ASHL	ASHL	ASHL	ASHL	ASHL
												ASKL
												ADLL		AIML	AIML	AIML	AIML	AIML	AIML	AIML	AIML	AIML	AIML	AIML	AIML
												AIML	AIML
													ASKL	ASKL	ASKL	ASKL	ASKL	ASKL	ASKL	ASKL	ASKL	ASKL	ASKL	ASKL	ASKL
													ADFL	ADFL	ADFL	ADFL	ADFL	ADFL	ADFL	ADFL	ADFL	ADFL	ADFL	ADFL	ADFL

## Sheet: L2_23hr
L2_23 hr
			iter22	iter21	iter20	iter19	iter18	iter17	iter16	iter15	iter14	iter13	iter12	iter11	iter10	iter9	iter8	iter7	iter6	iter5	iter4	iter3	iter2	iter1
										AIAL	AIAL	AIAL	AIAL	AIAL	AIAL	AIAL	AIAL	AIAL	AIAL	AIAL	AIAL	AIAL	AIAL	AIAL
									AIAL
									ASGL	ASGL	ASGL	ASGL	ASGL	ASGL	ASGL	ASGL	ASGL	ASGL	ASGL	ASGL	ASGL	ASGL	ASGL	ASGL
								AIAL
								AWAL	AWAL	AWAL	AWAL	AWAL	AWAL	AWAL	AWAL	AWAL	AWAL	AWAL	AWAL	AWAL	AWAL	AWAL	AWAL	AWAL
								AWBL
								ASEL	AWBL	AWBL	AWBL	AWBL	AWBL	AWBL	AWBL	AWBL	AWBL	AWBL	AWBL	AWBL	AWBL	AWBL	AWBL	AWBL
								ADFL	ASEL
								ASGL		ASEL	ASEL	ASEL	ASEL	ASEL	ASEL	ASEL	ASEL	ASEL	ASEL	ASEL	ASEL	ASEL	ASEL	ASEL
								AIZL
									ADFL	ADFL	ADFL	ADFL	ADFL	ADFL	ADFL	ADFL	ADFL	ADFL	ADFL	ADFL	ADFL	ADFL	ADFL	ADFL
									AIZL
										AIZL	AIZL	AIZL	AIZL	AIZL	AIZL	AIZL	AIZL	AIZL	AIZL	AIZL	AIZL	AIZL	AIZL	AIZL
					ALA	ALA	ALA	ALA	ALA	ALA	ALA	ALA	ALA	ALA	ALA	ALA	ALA	ALA	ALA	ALA	ALA	ALA	ALA	ALA
					AIAL	AIAL	AIAL
					AUAL	AUAL	AUAL	AUAL	AUAL	AUAL	AUAL	AUAL	AUAL	AUAL	AUAL	AUAL	AUAL	AUAL	AUAL	AUAL	AUAL	AUAL	AUAL	AUAL
					AWAL	AWAL	AWAL
					AIBL	AIBL	AIBL
					AWBL	AWBL	AWBL
					AWCL	AWCL	AWCL
					AFDL	AFDL	AFDL
					ASEL	ASEL	ASEL
					ADFL	ADFL	ADFL
					ASGL	ASGL	ASGL
					ASHL	ASHL	ASHL
					ASIL	ASIL	ASIL	ASIL	ASIL	ASIL	ASIL	ASIL	ASIL	ASIL	ASIL	ASIL	ASIL	ASIL	ASIL	ASIL	ASIL	ASIL	ASIL	ASIL
					ASJL	ASJL	ASJL
					ASKL	ASKL	ASKL
					ADLL	ADLL	ADLL
					AIML	AIML	AIML				AIBL	AIBL	AIBL	AIBL	AIBL	AIBL	AIBL	AIBL	AIBL	AIBL	AIBL	AIBL	AIBL	AIBL
					PVQL	PVQL	PVQL			AIBL
					AIYL	AIYL	AIYL			AWCL	AWCL	AWCL	AWCL	AWCL	AWCL	AWCL	AWCL	AWCL	AWCL	AWCL	AWCL	AWCL	AWCL	AWCL
			ALA	ALA	AIZL	AIZL	AIZL			AIYL
			SABD	SABD				AIBL	AIBL		AIYL	AIYL	AIYL	AIYL	AIYL	AIYL	AIYL	AIYL	AIYL	AIYL	AIYL	AIYL	AIYL	AIYL
			AIAL	AIAL				AWCL	AWCL
			AUAL	AUAL				AIYL	AIYL
			AWAL	AWAL				AFDL	AFDL	AFDL	AFDL	AFDL	AFDL	AFDL	AFDL	AFDL	AFDL	AFDL	AFDL	AFDL	AFDL	AFDL	AFDL	AFDL
			AIBL	AIBL
			AWBL	AWBL
			AWCL	AWCL								ASHL	ASHL	ASHL	ASHL	ASHL	ASHL	ASHL	ASHL	ASHL	ASHL	ASHL	ASHL	ASHL
			AFDL	AFDL				ASHL	ASHL	ASHL	ASHL
			ASEL	ASEL				ASJL	ASJL	ASJL	ASJL	ASJL	ASJL	ASJL	ASJL	ASJL	ASJL	ASJL	ASJL	ASJL	ASJL	ASJL	ASJL	ASJL
			ADFL	ADFL				ASKL	ASKL	ASKL	ASKL
			BAGL	BAGL				ADLL	ADLL	ADLL	ADLL	ADLL	ADLL	ADLL	ADLL	ADLL	ADLL	ADLL	ADLL	ADLL	ADLL	ADLL	ADLL	ADLL
			ASGL	ASGL				AIML	AIML	AIML	AIML
			ASHL	ASHL				PVQL	PVQL	PVQL	PVQL	PVQL	PVQL	PVQL	PVQL	PVQL	PVQL	PVQL	PVQL	PVQL	PVQL	PVQL	PVQL	PVQL
			ASIL	ASIL
			ASJL	ASJL								ASKL	ASKL	ASKL	ASKL	ASKL	ASKL	ASKL	ASKL	ASKL	ASKL	ASKL	ASKL	ASKL
			ASKL	ASKL								AIML
			ADLL	ADLL									AIML	AIML	AIML	AIML	AIML	AIML	AIML	AIML	AIML	AIML	AIML	AIML
			AIML	AIML
			AINL	AINL
			PVQL	PVQL
			AIYL	AIYL
			AIZL	AIZL
			AIAR	AIAR								SABD	SABD	SABD	SABD	SABD	SABD	SABD	SABD	SABD	SABD	SABD	SABD	SABD
			AUAR	AUAR							SABD
			AWAR	AWAR							PVQR	PVQR	PVQR	PVQR	PVQR	PVQR	PVQR	PVQR	PVQR	PVQR	PVQR	PVQR	PVQR	PVQR
			AIBR	AIBR
			RIBR	RIBR
			AWBR	AWBR							RIBR	RIBR	RIBR	RIBR	RIBR	RIBR	RIBR	RIBR	RIBR	RIBR	RIBR	RIBR	RIBR	RIBR
			AWCR	AWCR
			AFDR	AFDR									BAGL	BAGL	BAGL	BAGL	BAGL	BAGL	BAGL	BAGL	BAGL	BAGL	BAGL	BAGL
			ASER	ASER				SABD	SABD	SABD		BAGL
			ADFR	ADFR				BAGL	BAGL	BAGL		AINL	AINL	AINL	AINL	AINL	AINL	AINL	AINL	AINL	AINL	AINL	AINL	AINL
			BAGR	BAGR				AINL	AINL	AINL
			ASGR	ASGR				AIAR	AIAR	AIAR		AUAR	AUAR	AUAR	AUAR	AUAR	AUAR	AUAR	AUAR	AUAR	AUAR	AUAR	AUAR	AUAR
			ASHR	ASHR				AUAR	AUAR	AUAR	BAGL	AFDR
			RIR	RIR				AWAR	AWAR	AWAR	AINL		AFDR	AFDR	AFDR	AFDR	AFDR	AFDR	AFDR	AFDR	AFDR	AFDR	AFDR	AFDR
			ASIR	ASIR				AIBR	AIBR	AIBR	AUAR
			ASJR	ASJR				RIBR	RIBR	RIBR	AIBR	AIBR	AIBR	AIBR	AIBR	AIBR	AIBR	AIBR	AIBR	AIBR	AIBR	AIBR	AIBR	AIBR
			ASKR	ASKR				AWBR	AWBR	AWBR	AFDR
			ADLR	ADLR				AFDR	AFDR	AFDR	ASER
			AIMR	AIMR				ASER	ASER	ASER	ASIR
			AINR	AINR				ADFR	ADFR	ADFR	AIYR		ASER	ASER	ASER	ASER	ASER	ASER	ASER	ASER	ASER	ASER	ASER	ASER
			PVQR	PVQR				ASGR	ASGR	ASGR	AIZR	ASER
			AIYR	AIYR				ASHR	ASHR	ASHR		ASIR	ASIR	ASIR	ASIR	ASIR	ASIR	ASIR	ASIR	ASIR	ASIR	ASIR	ASIR	ASIR
			AIZR	AIZR				ASIR	ASIR	ASIR		AIYR
					SABD	SABD	SABD	ASJR	ASJR	ASJR		AIZR	AIZR	AIZR	AIZR	AIZR	AIZR	AIZR	AIZR	AIZR	AIZR	AIZR	AIZR	AIZR
					BAGL	BAGL	BAGL	ASKR	ASKR	ASKR
					AINL	AINL	AINL	ADLR	ADLR	ADLR			AIYR	AIYR	AIYR	AIYR	AIYR	AIYR	AIYR	AIYR	AIYR	AIYR	AIYR	AIYR
					AIAR	AIAR	AIAR	AIMR	AIMR	AIMR
					AUAR	AUAR	AUAR	PVQR	PVQR	PVQR
					AWAR	AWAR	AWAR	AIYR	AIYR	AIYR			AIAR	AIAR	AIAR	AIAR	AIAR	AIAR	AIAR	AIAR	AIAR	AIAR	AIAR	AIAR
					AIBR	AIBR	AIBR	AIZR	AIZR	AIZR		AIAR
					RIBR	RIBR	RIBR					ASGR	ASGR	ASGR	ASGR	ASGR	ASGR	ASGR	ASGR	ASGR	ASGR	ASGR	ASGR	ASGR
					AWBR	AWBR	AWBR				AIAR
					AFDR	AFDR	AFDR				AWAR		AWAR	AWAR	AWAR	AWAR	AWAR	AWAR	AWAR	AWAR	AWAR	AWAR	AWAR	AWAR
					ASER	ASER	ASER				AWBR	AWAR
					ADFR	ADFR	ADFR				ADFR	AWBR	AWBR	AWBR	AWBR	AWBR	AWBR	AWBR	AWBR	AWBR	AWBR	AWBR	AWBR	AWBR
					ASGR	ASGR	ASGR				ASGR	ADFR
					ASHR	ASHR	ASHR				ASHR		ADFR	ADFR	ADFR	ADFR	ADFR	ADFR	ADFR	ADFR	ADFR	ADFR	ADFR	ADFR
					ASIR	ASIR	ASIR				ASJR
					ASJR	ASJR	ASJR				ASKR	ASHR	ASHR	ASHR	ASHR	ASHR	ASHR	ASHR	ASHR	ASHR	ASHR	ASHR	ASHR	ASHR
					ASKR	ASKR	ASKR				ADLR	ADLR
					ADLR	ADLR	ADLR				AIMR		ADLR	ADLR	ADLR	ADLR	ADLR	ADLR	ADLR	ADLR	ADLR	ADLR	ADLR	ADLR
					AIMR	AIMR	AIMR
					PVQR	PVQR	PVQR					ASJR	ASJR	ASJR	ASJR	ASJR	ASJR	ASJR	ASJR	ASJR	ASJR	ASJR	ASJR	ASJR
					AIYR	AIYR	AIYR
					AIZR	AIZR	AIZR					ASKR	ASKR	ASKR	ASKR	ASKR	ASKR	ASKR	ASKR	ASKR	ASKR	ASKR	ASKR	ASKR
					AWCR	AWCR	AWCR					AIMR
					BAGR	BAGR	BAGR						AIMR	AIMR	AIMR	AIMR	AIMR	AIMR	AIMR	AIMR	AIMR	AIMR	AIMR	AIMR
					RIR	RIR	RIR
					AINR	AINR	AINR
									AWCR	AWCR	AWCR	AWCR	AWCR	AWCR	AWCR	AWCR	AWCR	AWCR	AWCR	AWCR	AWCR	AWCR	AWCR	AWCR
								AWCR
								BAGR
								RIR		BAGR	BAGR	BAGR	BAGR	BAGR	BAGR	BAGR	BAGR	BAGR	BAGR	BAGR	BAGR	BAGR	BAGR	BAGR
								AINR	BAGR
									RIR	RIR	RIR	RIR	RIR	RIR	RIR	RIR	RIR	RIR	RIR	RIR	RIR	RIR	RIR	RIR
									AINR
										AINR	AINR	AINR	AINR	AINR	AINR	AINR	AINR	AINR	AINR	AINR	AINR	AINR	AINR	AINR
			iter22	iter21	iter20	iter19	iter18	iter17	iter16	iter15	iter14	iter13	iter12	iter11	iter10	iter9	iter8	iter7	iter6	iter5	iter4	iter3	iter2	iter1
													ADAL	ADAL	ADAL	ADAL	ADAL	ADAL	ADAL	ADAL	ADAL	ADAL	ADAL	ADAL
												ADAL
												SIBVR
													SIBVR	SIBVR	SIBVR	SIBVR	SIBVR	SIBVR	SIBVR	SIBVR	SIBVR	SIBVR	SIBVR	SIBVR
											ADAL
											RIFL	RIFL	RIFL	RIFL	RIFL	RIFL	RIFL	RIFL	RIFL	RIFL	RIFL	RIFL	RIFL	RIFL
											SIBVL
											ADAR
											SIBVR		SIBVL	SIBVL	SIBVL	SIBVL	SIBVL	SIBVL	SIBVL	SIBVL	SIBVL	SIBVL	SIBVL	SIBVL
												SIBVL
												ADAR
							ADAL	ADAL	ADAL	ADAL			ADAR	ADAR	ADAR	ADAR	ADAR	ADAR	ADAR	ADAR	ADAR	ADAR	ADAR	ADAR
							RIFL	RIFL	RIFL	RIFL
							AVFL	AVFL	AVFL	AVFL
							SIBVL	SIBVL	SIBVL	SIBVL
							ADAR	ADAR	ADAR	ADAR
							AVFR	AVFR	AVFR	AVFR
							SIBVR	SIBVR	SIBVR	SIBVR		AVFL	AVFL	AVFL	AVFL	AVFL	AVFL	AVFL	AVFL	AVFL	AVFL	AVFL	AVFL	AVFL
											AVFL
			DVA	DVA	DVA	DVA					AVFR
			RID	RID	RID	RID						AVFR	AVFR	AVFR	AVFR	AVFR	AVFR	AVFR	AVFR	AVFR	AVFR	AVFR	AVFR	AVFR
			ADAL	ADAL	ADAL	ADAL
			AVBL	AVBL	AVBL	AVBL
			PVCL	PVCL	PVCL	PVCL								DVA	DVA	DVA	DVA	DVA	DVA	DVA	DVA	DVA	DVA	DVA
			AVDL	AVDL	AVDL	AVDL							DVA
			RIFL	RIFL	RIFL	RIFL							PVPL
			AVFL	AVFL	AVFL	AVFL								PVPL	PVPL	PVPL	PVPL	PVPL	PVPL	PVPL	PVPL	PVPL	PVPL	PVPL
			AVHL	AVHL	AVHL	AVHL						DVA
			AVJL	AVJL	AVJL	AVJL						AVHL	AVHL	AVHL	AVHL	AVHL	AVHL	AVHL	AVHL	AVHL	AVHL	AVHL	AVHL	AVHL
			ALML	ALML	ALML	ALML						PVPL
			PVPL	PVPL	PVPL	PVPL						AVHR	AVHR	AVHR	AVHR	AVHR	AVHR	AVHR	AVHR	AVHR	AVHR	AVHR	AVHR	AVHR
			SDQL	SDQL	SDQL	SDQL						SDQR
			BDUL	BDUL	BDUL	BDUL						PVR
			SIBVL	SIBVL	SIBVL	SIBVL							SDQR	SDQR	SDQR	SDQR	SDQR	SDQR	SDQR	SDQR	SDQR	SDQR	SDQR	SDQR
			AVM	AVM	AVM	AVM
			ADAR	ADAR	ADAR	ADAR							PVR	PVR	PVR	PVR	PVR	PVR	PVR	PVR	PVR	PVR	PVR	PVR
			AVBR	AVBR	AVBR	AVBR
			PVCR	PVCR	PVCR	PVCR
			AVDR	AVDR	AVDR	AVDR
			RIFR	RIFR	RIFR	RIFR								RID	RID	RID	RID	RID	RID	RID	RID	RID	RID	RID
			AVFR	AVFR	AVFR	AVFR
			AVHR	AVHR	AVHR	AVHR							RID
			AVJR	AVJR	AVJR	AVJR							AVDR	AVDR	AVDR	AVDR	AVDR	AVDR	AVDR	AVDR	AVDR	AVDR	AVDR	AVDR
			ALMR	ALMR	ALMR	ALMR							AVJR
			PVPR	PVPR	PVPR	PVPR
			AQR	AQR	AQR	AQR								AVJR	AVJR	AVJR	AVJR	AVJR	AVJR	AVJR	AVJR	AVJR	AVJR	AVJR
			SDQR	SDQR	SDQR	SDQR
			BDUR	BDUR	BDUR	BDUR
			SIBVR	SIBVR	SIBVR	SIBVR						RID		AVBL	AVBL	AVBL	AVBL	AVBL	AVBL	AVBL	AVBL	AVBL	AVBL	AVBL
			PVR	PVR	PVR	PVR						AVBL	AVBL
							DVA	DVA	DVA	DVA	DVA	PVCL	PVCL	PVCL	PVCL	PVCL	PVCL	PVCL	PVCL	PVCL	PVCL	PVCL	PVCL	PVCL
							RID	RID	RID	RID	RID	AVDR
							AVBL	AVBL	AVBL	AVBL	AVBL	AVJR
							PVCL	PVCL	PVCL	PVCL	PVCL	AVDL
							AVDL	AVDL	AVDL	AVDL	AVDL	AVJL		AVDL	AVDL	AVDL	AVDL	AVDL	AVDL	AVDL	AVDL	AVDL	AVDL	AVDL
							AVHL	AVHL	AVHL	AVHL	AVHL	AVM
							AVJL	AVJL	AVJL	AVJL	AVJL	AVBR	AVDL
							ALML	ALML	ALML	ALML	ALML	PVCR	AVJL	AVJL	AVJL	AVJL	AVJL	AVJL	AVJL	AVJL	AVJL	AVJL	AVJL	AVJL
							PVPL	PVPL	PVPL	PVPL	PVPL	ALMR	PVCR
							SDQL	SDQL	SDQL	SDQL	SDQL	PVPR		PVCR	PVCR	PVCR	PVCR	PVCR	PVCR	PVCR	PVCR	PVCR	PVCR	PVCR
							BDUL	BDUL	BDUL	BDUL	BDUL	AQR
							AVM	AVM	AVM	AVM	AVM	BDUR
							AVBR	AVBR	AVBR	AVBR	AVBR		AVM	AVM	AVM	AVM	AVM	AVM	AVM	AVM	AVM	AVM	AVM	AVM
							PVCR	PVCR	PVCR	PVCR	PVCR
							AVDR	AVDR	AVDR	AVDR	AVDR		AVBR	AVBR	AVBR	AVBR	AVBR	AVBR	AVBR	AVBR	AVBR	AVBR	AVBR	AVBR
							RIFR	RIFR	RIFR	RIFR	RIFR		AQR
							AVHR	AVHR	AVHR	AVHR	AVHR			AQR	AQR	AQR	AQR	AQR	AQR	AQR	AQR	AQR	AQR	AQR
							AVJR	AVJR	AVJR	AVJR	AVJR
							ALMR	ALMR	ALMR	ALMR	ALMR
							PVPR	PVPR	PVPR	PVPR	PVPR		ALMR	ALMR	ALMR	ALMR	ALMR	ALMR	ALMR	ALMR	ALMR	ALMR	ALMR	ALMR
							AQR	AQR	AQR	AQR	AQR
							SDQR	SDQR	SDQR	SDQR	SDQR		PVPR	PVPR	PVPR	PVPR	PVPR	PVPR	PVPR	PVPR	PVPR	PVPR	PVPR	PVPR
							BDUR	BDUR	BDUR	BDUR	BDUR
							PVR	PVR	PVR	PVR	PVR		BDUR	BDUR	BDUR	BDUR	BDUR	BDUR	BDUR	BDUR	BDUR	BDUR	BDUR	BDUR
												RIFR	RIFR	RIFR	RIFR	RIFR	RIFR	RIFR	RIFR	RIFR	RIFR	RIFR	RIFR	RIFR
													ALML	ALML	ALML	ALML	ALML	ALML	ALML	ALML	ALML	ALML	ALML	ALML
												ALML
												SDQL	SDQL	SDQL	SDQL	SDQL	SDQL	SDQL	SDQL	SDQL	SDQL	SDQL	SDQL	SDQL
												BDUL
													BDUL	BDUL	BDUL	BDUL	BDUL	BDUL	BDUL	BDUL	BDUL	BDUL	BDUL	BDUL

## Sheet: L3_27hr
	22	21	20	19	18	17	16	15	14	13	12	11	10	9	8	7	6	5	4	3	2	1
											AIYR	AIYR	AIYR	AIYR	AIYR	AIYR	AIYR	AIYR	AIYR	AIYR	AIYR	AIYR
											AINL	AINL	AINL	AINL	AINL	AINL	AINL	AINL	AINL	AINL	AINL	AINL
										AINL
										AFDR	AFDR	AFDR	AFDR	AFDR	AFDR	AFDR	AFDR	AFDR	AFDR	AFDR	AFDR	AFDR
										AIYR
										AINR	AINR	AINR	AINR	AINR	AINR	AINR	AINR	AINR	AINR	AINR	AINR	AINR
										AWBR	AWBR	AWBR	AWBR	AWBR	AWBR	AWBR	AWBR	AWBR	AWBR	AWBR	AWBR	AWBR
									AWBR
									AUAL	AUAL	AUAL	AUAL	AUAL	AUAL	AUAL	AUAL	AUAL	AUAL	AUAL	AUAL	AUAL	AUAL
									AFDL
									AINL
									AFDR
									AIYR	AFDL	AFDL	AFDL	AFDL	AFDL	AFDL	AFDL	AFDL	AFDL	AFDL	AFDL	AFDL	AFDL
									AINR
									ADFR
									AUAR
									RIBR
									RIBL		ADFR	ADFR	ADFR	ADFR	ADFR	ADFR	ADFR	ADFR	ADFR	ADFR	ADFR	ADFR
		AWBR	AWBR	AWBR	AWBR	AWBR	AWBR	AWBR		ADFR
		ADFR	ADFR	ADFR	ADFR	ADFR	ADFR	ADFR		AUAR	AUAR	AUAR	AUAR	AUAR	AUAR	AUAR	AUAR	AUAR	AUAR	AUAR	AUAR	AUAR
		AINL	AINL	AINL	AINL	AINL	AINL	AINL		RIBR
		AFDR	AFDR	AFDR	AFDR	AFDR	AFDR	AFDR		RIBL	RIBL	RIBL	RIBL	RIBL	RIBL	RIBL	RIBL	RIBL	RIBL	RIBL	RIBL	RIBL
		AUAR	AUAR	AUAR	AUAR	AUAR	AUAR	AUAR
		AIYR	AIYR	AIYR	AIYR	AIYR	AIYR	AIYR			RIBR	RIBR	RIBR	RIBR	RIBR	RIBR	RIBR	RIBR	RIBR	RIBR	RIBR	RIBR
		AUAL	AUAL	AUAL	AUAL	AUAL	AUAL	AUAL
		AFDL	AFDL	AFDL	AFDL	AFDL	AFDL	AFDL
		RIBR	RIBR	RIBR	RIBR	RIBR	RIBR	RIBR
		RIBL	RIBL	RIBL	RIBL	RIBL	RIBL	RIBL
		AINR	AINR	AINR	AINR	AINR	AINR	AINR
		BAGR	BAGR	BAGR	BAGR	BAGR	BAGR	BAGR			ADFL	ADFL	ADFL	ADFL	ADFL	ADFL	ADFL	ADFL	ADFL	ADFL	ADFL	ADFL	ADFL
		AWAR	AWAR	AWAR	AWAR	AWAR	AWAR	AWAR
		ADFL	ADFL	ADFL	ADFL	ADFL	ADFL	ADFL			BAGR	BAGR	BAGR	BAGR	BAGR	BAGR	BAGR	BAGR	BAGR	BAGR	BAGR	BAGR	BAGR
		AIZR	AIZR	AIZR	AIZR	AIZR	AIZR	AIZR		BAGR
		RIR	RIR	RIR	RIR	RIR	RIR	RIR		AWAR	AWAR	AWAR	AWAR	AWAR	AWAR	AWAR	AWAR	AWAR	AWAR	AWAR	AWAR	AWAR	AWAR
		AIYL	AIYL	AIYL	AIYL	AIYL	AIYL	AIYL		ADFL
		AIBR	AIBR	AIBR	AIBR	AIBR	AIBR	AIBR		AIZR	AIZR	AIZR	AIZR	AIZR	AIZR	AIZR	AIZR	AIZR	AIZR	AIZR	AIZR	AIZR	AIZR
		BAGL	BAGL	BAGL	BAGL	BAGL	BAGL	BAGL		RIR
		ASER	ASER	ASER	ASER	ASER	ASER	ASER			RIR	RIR	RIR	RIR	RIR	RIR	RIR	RIR	RIR	RIR	RIR	RIR	RIR
	ASHR								BAGR
	AIAR								AWAR
	ASKR								ADFL	AIYL	AIYL	AIYL	AIYL	AIYL	AIYL	AIYL	AIYL	AIYL	AIYL	AIYL	AIYL	AIYL	AIYL
	PVQR								AIZR
	ASJR								RIR
	AIMR								AIYL		AIBR	AIBR	AIBR	AIBR	AIBR	AIBR	AIBR	AIBR	AIBR	AIBR	AIBR	AIBR	AIBR
	ASGR								AIBR	AIBR
	PVDL								BAGL	BAGL	BAGL	BAGL	BAGL	BAGL	BAGL	BAGL	BAGL	BAGL	BAGL	BAGL	BAGL	BAGL	BAGL
	AWCR								ASER
	ASIR
	AIBL									ASER	ASER	ASER	ASER	ASER	ASER	ASER	ASER	ASER	ASER	ASER	ASER	ASER	ASER
	AWCL
	ASIL
	AIZL
	ASEL
	AWBR
	BAGR
	ADFR
	AWAR
	AINL
	AFDR
	AUAR
	AIYR
	ADFL
	AUAL
	AFDL
	AIZR
	RIR								PVDL	PVDL	PVDL	PVDL	PVDL	PVDL	PVDL	PVDL	PVDL	PVDL	PVDL	PVDL	PVDL	PVDL
	RIBR				PVDL	PVDL	PVDL	PVDL
	AIYL				AIAR	AIAR	AIAR	AIAR
	RIBL				ASIR	ASIR	ASIR	ASIR		AIAR	AIAR	AIAR	AIAR	AIAR	AIAR	AIAR	AIAR	AIAR	AIAR	AIAR	AIAR	AIAR
	AIBR		PVDL	PVDL					AIAR
	AINR		AIAR	AIAR					ASIR	ASIR	ASIR	ASIR	ASIR	ASIR	ASIR	ASIR	ASIR	ASIR	ASIR	ASIR	ASIR	ASIR
	BAGL		ASIR	ASIR
	ASER	ASHR	AIZL	AIZL
		ASKR	ASGR	ASGR
		PVQR			AIZL	AIZL	AIZL	AIZL	AIZL	AIZL	AIZL	AIZL	AIZL	AIZL	AIZL	AIZL	AIZL	AIZL	AIZL	AIZL	AIZL	AIZL
		ASJR			ASGR	ASGR	ASGR
		AIMR						ASGR	ASGR	ASGR	ASGR	ASGR	ASGR	ASGR	ASGR	ASGR	ASGR	ASGR	ASGR	ASGR	ASGR	ASGR
		AWCR
		AIAR
		ASGR
		PVDL
		ASIR					ASHR	ASHR	ASHR	ASHR	ASHR	ASHR	ASHR	ASHR	ASHR	ASHR	ASHR	ASHR	ASHR	ASHR	ASHR	ASHR
		AIZL			ASHR	ASHR
		AIBL			AWCR	AWCR	AWCR	AWCR	AWCR	AWCR	AWCR	AWCR	AWCR	AWCR	AWCR	AWCR	AWCR	AWCR	AWCR	AWCR	AWCR	AWCR
		AWCL	ASHR	ASHR
		ASIL	AWCR	AWCR
		ASEL	ASKR	ASKR
			AIMR	AIMR						ASKR	ASKR	ASKR	ASKR	ASKR	ASKR	ASKR	ASKR	ASKR	ASKR	ASKR	ASKR	ASKR
			PVQR	PVQR			ASKR	ASKR	ASKR
			ASJR	ASJR	ASKR	ASKR	AIMR	AIMR	AIMR	AIMR	AIMR	AIMR	AIMR	AIMR	AIMR	AIMR	AIMR	AIMR	AIMR	AIMR	AIMR	AIMR
					AIMR	AIMR
					PVQR	PVQR
					ASJR	ASJR				PVQR	PVQR	PVQR	PVQR	PVQR	PVQR	PVQR	PVQR	PVQR	PVQR	PVQR	PVQR	PVQR
							PVQR	PVQR	PVQR
							ASJR	ASJR	ASJR	ASJR	ASJR	ASJR	ASJR	ASJR	ASJR	ASJR	ASJR	ASJR	ASJR	ASJR	ASJR	ASJR
			AIBL	AIBL	AIBL	AIBL	AIBL	AIBL	AIBL	AIBL	AIBL	AIBL	AIBL	AIBL	AIBL	AIBL	AIBL	AIBL	AIBL	AIBL	AIBL	AIBL
			AWCL	AWCL	AWCL	AWCL	AWCL	AWCL	AWCL
			ASIL	ASIL	ASIL	ASIL	ASIL	ASIL	ASIL
			ASEL	ASEL	ASEL	ASEL	ASEL	ASEL	ASEL		AWCL	AWCL	AWCL	AWCL	AWCL	AWCL	AWCL	AWCL	AWCL	AWCL	AWCL	AWCL
										AWCL
										ASIL	ASIL	ASIL	ASIL	ASIL	ASIL	ASIL	ASIL	ASIL	ASIL	ASIL	ASIL	ASIL
										ASEL
											ASEL	ASEL	ASEL	ASEL	ASEL	ASEL	ASEL	ASEL	ASEL	ASEL	ASEL	ASEL
										AWBL	AWBL	AWBL	AWBL
									AWBL
									ADLR	ADLR	ADLR	ADLR	ADLR
								AWBL
								ADLR
								ALA	ALA	ALA	ALA	ALA	ALA
						AWBL	AWBL
						ADLR	ADLR
						ALA	ALA
						ADLL	ADLL	ADLL	ADLL	ADLL	ADLL	ADLL	ADLL
						AWAL	AWAL
			AWBL	AWBL	AWBL			AWAL	AWAL	AWAL	AWAL	AWAL	AWAL
			ADLL	ADLL	ADLL
			ALA	ALA	ALA
			ADLR	ADLR	ADLR
			AWAL	AWAL	AWAL
			PVQL	PVQL	PVQL
			ASJL	ASJL	ASJL					PVQL	PVQL	PVQL	PVQL
			ASGL	ASGL	ASGL		PVQL	PVQL	PVQL
			ASKL	ASKL	ASKL		ASJL	ASJL	ASJL
			AIAL	AIAL	AIAL		ASKL	ASKL	ASKL		ASJL	ASJL	ASJL
		AWBL				PVQL				ASJL
		ADLL				ASJL				ASKL	ASKL	ASKL	ASKL
		ALA				ASKL
		ADLR				ASGL
		AWAL				AIAL
		PVQL					ASGL	ASGL	ASGL	ASGL	ASGL	ASGL	ASGL
		ASJL					AIAL
		ASGL						AIAL	AIAL	AIAL	AIAL	AIAL	AIAL
		ASKL
		AIAL
		AVFL
		AVAR
	AWBL		AVFL	AVFL	AVFL	AVFL	AVFL	AVFL	AVFL	AVFL	AVFL	AVFL	AVFL
	AVFL		AVAR	AVAR	AVAR
	PVQL					AVAR	AVAR	AVAR	AVAR	AVAR	AVAR	AVAR	AVAR
	ASJL
	ASGL
	ADLL
	ALA
	ADLR
	AWAL
	ASKL
	AIAL
	AVAR
	AVFR
	ASHL
	AIML
	RIFL
	RIFR					AVFR	AVFR	AVFR	AVFR	AVFR	AVFR	AVFR	AVFR
		AVFR	AVFR	AVFR	AVFR
		ASHL	ASHL	ASHL	ASHL
		AIML	AIML	AIML	AIML
		RIFL	RIFL	RIFL	RIFL			ASHL	ASHL	ASHL	ASHL	ASHL	ASHL
		RIFR	RIFR	RIFR	RIFR			AIML	AIML
						ASHL	ASHL			AIML	AIML	AIML	AIML
						AIML	AIML
						RIFL	RIFL
						RIFR	RIFR
								RIFL	RIFL	RIFL	RIFL	RIFL	RIFL
								RIFR
									RIFR	RIFR	RIFR	RIFR	RIFR

## Sheet: L4_36hr
	Iter 23	Iter 22	Iter 21	Iter 20	Iter 19	Iter 18	Iter 17	Iter 16	Iter 15	Iter 14	Iter 13	Iter 12	Iter 11	Iter 10
											PVQL	PVQL	PVQL	PVQL
											ADLL	ADLL	ADLL	ADLL
									ADLL	ADLL
									AIAL	AIAL	ASKL	ASKL	ASKL	ASKL
								ADLL	ASJL	ASJL
								AIAL	ASKL	ASKL	ASJL	ASJL	ASJL	ASJL
						ADLL	ADLL	ALA	PVQL	PVQL
						AIAL	AIAL	ASJL			AIAL	AIAL	AIAL	AIAL
						AIBL	AIBL	ASKL
						AIBR	AIBR	PVQL	ALA	ALA	ALA	ALA	ALA	ALA
						ALA	ALA
						ASJL	ASJL
					ADLL	ASKL	ASKL					AIBL	AIBL	AIBL
					AIAL	PVQL	PVQL				AIBL
					AIBL	RIR	RIR	AIBL	AIBL	AIBL	AIBR	AIBR	AIBR	AIBR
					AIBR	URXL	URXL	AIBR	AIBR	AIBR
					ALA			RIR	URXL	URXL	URXL	URXL	URXL	URXL
					ASGL			URXL
		ADAL	ADAL	ADAL	ASJL				RIR	RIR	RIR	RIR	RIR	RIR
		ADLL	ADLL	AIML	ASKL
		AIML	AIML	ALA	PVQL	ASGL	ASGL	ASGL	ASGL	ASGL	ASGL	ASGL	ASGL	ASGL
		ALA	ALA	ASHL	RIR
		ASHL	ASHL	ASHR	URXL
		ASHR	ASHR	ASJL
	ADAL	ASJL	ASJL	ASKL				ASHR	ASHR	ASHR	ASHR	ASHR	ASHR	ASHR
	ADAR	ASKL	ASKL	AVFL	ADAL	ADAL	ADAL
	ADLL	AVFL	AVFL	AVFR	AIML	AIML	AIML						AVAL	AVAL
	AIML	AVFR	AVFR	PVQL	ASHL	ASHL	ASHL				AVAL	AVAL
	AIMR	PVQL	PVQL	ADLL	ASHR	ASHR	ASHR				AVAR	AVAR	AVAR	AVAR
	ALA	AIAL	AIAL	AIAL	AVFL	AVFL	AVFL	ADAL	ADAL	ADAL
	ALML	AIBL	AIBL	AIBL	AVFR	AVFR	AVFR	AIML	AIML	AIML	AVFL	AVFL	AVFL	AVFL
	ALMR	AIBR	AIBR	AIBR	AVAL	AVAL	AVAL	ASHL	ASHL	ASHL	AVFR	AVFR
	AQR	ASGL	ASGL	ASGL	AVAR	AVAR	AVAR	AVFL	AVFL	AVFL			AVFR	AVFR
	ASHL	AVAL	AVAL	AVAL	RIFL	RIFL	RIFL	AVFR	AVFR	AVFR
	ASHR	AVAR	AVAR	AVAR				AVAL	AVAL	AVAL	AIML	AIML	AIML	AIML
	ASJL	RIFL	RIFL	RIFL				AVAR	AVAR	AVAR
	ASJR	RIR	RIR	RIR				RIFL	RIFL	RIFL		ADAL	ADAL	ADAL
	ASKL	URXL	URXL	URXL							ADAL
	ASKR										ASHL	RIFL	RIFL	RIFL
	AVBL										RIFL
	AVBR											ASHL	ASHL	ASHL
	AVDL
	AVDR
	AVFL											ADFL	ADFL	ADFL
	AVFR								ADFL	ADFL	ADFL
	AVHL		ADFL	ADFL	ADFL	ADFL	ADFL	ADFL	AIZR	AIZR	AWAL	AWAL	AWAL	AWAL
	AVHR		AIZR	AIZR	AIZR	AIZR	AIZR	AIZR	AWAL	AWAL
	AVJL	AIMR	AWAL	AWAL	AWAL	AWAL	AWAL	AWAL			AIZR	AIZR	AIZR	AIZR
	AVJR	ASJR	AWAR	AWAR	AWAR	AWAR	AWAR	AWAR
	AVM	ASKR							AWAR	AWAR	AWAR	AWAR	AWAR	AWAR
	BDUL	PVQR
	BDUR	ADFL			AIMR	AIMR	AIMR	AIMR	AIMR	AIMR	AIMR	AIMR	AIMR	AIMR
	DVA	AIZL		AIMR
	HSNR	AIZR	AIMR	PVQR	PVQR	PVQR	PVQR	PVQR	PVQR	PVQR	PVQR	PVQR	PVQR	PVQR
	PVCL	AWAL	AIZL
	PVCR	AWAR	ASJR				AIZL	AIZL	AIZL	AIZL	AIZL	AIZL	AIZL	AIZL
	PVNL		ASKR	AIZL	AIZL	AIZL
	PVPL		PVQR	ASJR	ASJR	ASJR	ASJR	ASJR	ASJR	ASJR	ASJR	ASJR	ASJR	ASJR
	PVPR			ASKR	ASKR	ASKR	ASKR	ASKR
	PVQL								ASKR	ASKR	ASKR	ASKR	ASKR	ASKR
	PVQR
	RID
	RIFL	ALML	ALML	ALML	ALML	ALML	ALML	ALML	ALML	ADAR	ADAR	DVA	DVA	DVA
	RIFR	ALMR	ALMR	ALMR	ALMR	ALMR	ALMR	ALMR	ALMR	DVA	DVA
	ADFL	AQR	AQR	AQR	AQR	AQR	AQR	AQR	AQR			ADAR	ADAR	ADAR
	AIAL	AVBL	AVBL	AVBL	AVBL	AVBL	AVBL	AVBL	AVBL
	AIBL	AVBR	AVBR	AVBR	AVBR	AVBR	AVBR	AVBR	AVBR				AVHL	AVHL
	AIBR	AVDL	AVDL	AVDL	AVDL	AVDL	AVDL	AVDL	AVDL			AVHL
	AIZL	AVDR	AVDR	AVDR	AVDR	AVDR	AVDR	AVDR	AVDR			PVPR	PVPR	PVPR
	AIZR	AVHL	AVHL	AVHL	AVHL	AVHL	AVHL	AVHL	AVHL		AVHL
	ASGL	AVHR	AVHR	AVHR	AVHR	AVHR	AVHR	AVHR	AVHR		PVPR	RID	RID	RID
	AVAL	AVJL	AVJL	AVJL	AVJL	AVJL	AVJL	AVJL	AVJL		PVR
	AVAR	AVJR	AVJR	AVJR	AVJR	AVJR	AVJR	AVJR	AVJR		RID	PVR	PVR	PVR
	AWAL	AVM	AVM	AVM	AVM	AVM	AVM	AVM	AVM	ALML
	AWAR	BDUL	BDUL	BDUL	BDUL	BDUL	BDUL	BDUL	BDUL	ALMR		HSNR	HSNR	HSNR
	PVR	BDUR	BDUR	BDUR	BDUR	BDUR	BDUR	BDUR	BDUR	AQR	AVM	PVNL
	RIR	DVA	DVA	DVA	DVA	DVA	DVA	DVA	DVA	AVBL	PVNL		PVNL	PVNL
	URXL	PVCL	PVCL	PVCL	PVCL	PVCL	PVCL	PVCL	PVCL	AVBR	HSNR
		PVCR	PVCR	PVCR	PVCR	PVCR	PVCR	PVCR	PVCR	AVDL		AVM	AVM	AVM
		PVNL	PVNL	PVNL	PVNL	PVNL	PVNL	PVNL	PVNL	AVDR
		PVPL	PVPL	PVPL	PVPL	PVPL	PVPL	PVPL	PVPL	AVJL	RIFR	RIFR	RIFR	RIFR
		PVPR	PVPR	PVPR	PVPR	PVPR	PVPR	PVPR	PVPR	AVJR
		RID	RID	RID	RID	RID	RID	RID	RID	AVM	BDUR	BDUR	BDUR	BDUR
		ADAR	ADAR	ADAR	ADAR	ADAR	ADAR	ADAR	ADAR	BDUL
		HSNR	HSNR	HSNR	HSNR	HSNR	HSNR	HSNR	HSNR	BDUR				AQR
		PVR	PVR	PVR	PVR	PVR	PVR	PVR	PVR	PVCL			AQR
		RIFR	RIFR	RIFR	RIFR	RIFR	RIFR	RIFR	RIFR	PVCR		AQR	PVPL	PVPL
										PVNL		AVBL
										PVPL		AVDR	AVBL	AVBL
										PVPR		AVHR
										RID	ALML	PVPL	AVDR	AVDR
										AVHL	AQR
										AVHR	AVBL		AVHR	AVHR
										HSNR	AVBR
										PVR	AVDL	ALML	ALML	ALML
										RIFR	AVDR
											AVJL	BDUL	BDUL	BDUL
											AVJR
											PVCL		ALMR	ALMR
											PVCR
											PVPL		AVBR	AVBR
											BDUL	AVBR
											ALMR	AVJL	AVDL	AVDL
											AVHR	AVJR
												PVCL	AVJL	AVJL
												PVCR
												ALMR	AVJR	AVJR
												AVDL
													PVCL	PVCL
													PVCR	PVCR

## Sheet: Adult_48hr
Adult_48
			Iter 25	Iter 24	Iter 23	Iter 22	Iter 21	Iter 20	Iter 19	Iter 18	Iter 17	Iter 16	Iter 15	Iter 14	Iter 13	Iter 12	Iter 11	Iter 10
																ADAR	ADAR	ADAR
															ADAL
															ADAR	ADAL	ADAL	ADAL
																ASKL	ASKL	ASKL
															AIML
															ALA	ALA	ALA	ALA
															ASKL
																AIML	AIML	AIML
									ADAL	ADAL	ADAL	ADAL	ADAL	ADAL
									AIML	AIML	AIML	AIML	AIML	AIML	ASHL	ASHL	ASHL	ASHL
									ASHL	ASHL	ASHL	ASHL	ASHL	ASHL	ASHR
									ASHR	ASHR	ASHR	ASHR	ASHR	ASHR		ASHR	ASHR	ASHR
									AVFL	AVFL	AVFL	AVFL	AVFL	AVFL
									AVFR	AVFR	AVFR	AVFR	AVFR	AVFR	ASJL	ASJL	ASJL	ASJL
									ADAR	ADAR	ADAR	ADAR	ADAR	ADAR
									AIMR	AIMR	AIMR	AIMR	AIMR	AIMR	PVQL	PVQL	PVQL	PVQL
							ADAL	ADAL	ALA	ALA	ALA	ALA	ALA	ALA
							ADLL	ADLL	ASJL	ASJL	ASJL	ASJL	ASJL	ASJL	ASJR	ASJR	ASJR	ASJR
							AIML	AIML	ASJR	ASJR	ASJR	ASJR	ASJR	ASJR	ASKR
			ADAL	ADAL	ADAL	ADAL	ALA	ALA	ASKL	ASKL	ASKL	ASKL	ASKL	ASKL		ASKR	ASKR	ASKR
			ADAR	ADAR	ADAR	ADAR	ASHL	ASHL	ASKR	ASKR	ASKR	ASKR	ASKR	ASKR
			ADLL	ADLL	ADLL	ADLL	ASHR	ASHR	HSNL	HSNL	HSNL	HSNL	HSNL	HSNL	AIMR	AIMR	AIMR	AIMR
			AIML	AIML	AIML	AIML	ASJL	ASJL	PVQL	PVQL	PVQL	PVQL	PVQL	PVQL	PVQR
			AIMR	AIMR	AIMR	AIMR	ASKL	ASKL	PVQR	PVQR	PVQR	PVQR	PVQR	PVQR		PVQR	PVQR	PVQR
			ALA	ALA	ALA	ALA	AVFL	AVFL
			ALML	ALML	ALML	ALML	AVFR	AVFR							AVFL	AVFL	AVFL	AVFL
			ALMR	ALMR	ALMR	ALMR	PVQL	PVQL							AVFR
			AQR	AQR	AQR	AQR	AIMR	AIMR							HSNL	AVFR	AVFR	AVFR
			ASHL	ASHL	ASHL	ASHL	ASJR	ASJR								HSNL
			ASHR	ASHR	ASHR	ASHR	ASKR	ASKR									HSNL	HSNL
			ASJL	ASJL	ASJL	ASJL	PVQR	PVQR
			ASJR	ASJR	ASJR	ASJR	ADAR	ADAR	ADLL	ADLL	ADLL	ADLL	ADLL	ADLL	ADLL	ADLL	ADLL	ADLL
			ASKL	ASKL	ASKL	ASKL	ADLR	ADLR	ADLR	ADLR	ADLR	ADLR	ADLR	ADLR	ADLR
			ASKR	ASKR	ASKR	ASKR	HSNL	HSNL								ADLR	ADLR	ADLR
			AVBL	AVBL	AVBL	AVBL	HSNR	HSNR
			AVBR	AVBR	AVBR	AVBR	RIFR	RIFR							HSNR	HSNR	HSNR	HSNR
			AVDL	AVDL	AVDL	AVDL	SIBVL	SIBVL	HSNR	HSNR	HSNR	HSNR	HSNR	HSNR
			AVDR	AVDR	AVDR	AVDR			RIFR	RIFR	RIFR	RIFR	RIFR	RIFR	RIFR	RIFR	RIFR	RIFR
			AVFL	AVFL	AVFL	AVFL			SIBVL	SIBVL	SIBVL	SIBVL	SIBVL
			AVFR	AVFR	AVFR	AVFR								SIBVL	SIBVL	SIBVL	SIBVL	SIBVL
			AVHL	AVHL	AVHL	AVHL
			AVHR	AVHR	AVHR	AVHR										AVHL	AVHL	AVHL
			AVJL	AVJL	AVJL	AVJL								AVHL	AVHL
			AVJR	AVJR	AVJR	AVJR	ALML	ALML	ALML	ALML	ALML	ALML	ALML	AVHR	AVHR	AVHR	AVHR	AVHR
			AVM	AVM	AVM	AVM	ALMR	ALMR	ALMR	ALMR	ALMR	ALMR	ALMR	DVA	DVA
			BDUL	BDUL	BDUL	BDUL	AQR	AQR	AQR	AQR	AQR	AQR	AQR			DVA	DVA	DVA
			BDUR	BDUR	BDUR	BDUR	AVBL	AVBL	AVBL	AVBL	AVBL	AVBL	AVBL
			DVA	DVA	DVA	DVA	AVBR	AVBR	AVBR	AVBR	AVBR	AVBR	AVBR			BDUL	BDUL	BDUL
			HSNR	HSNR	HSNR	HSNR	AVDL	AVDL	AVDL	AVDL	AVDL	AVDL	AVDL		ALMR
			PVCL	PVCL	PVCL	PVCL	AVDR	AVDR	AVDR	AVDR	AVDR	AVDR	AVDR	ALML	BDUL	ALMR	ALMR	ALMR
			PVCR	PVCR	PVCR	PVCR	AVHL	AVHL	AVHL	AVHL	AVHL	AVHL	AVHL	ALMR	BDUR
			PVNL	PVNL	PVNL	PVNL	AVHR	AVHR	AVHR	AVHR	AVHR	AVHR	AVHR	AQR	PVNR	PVNR	PVNR	PVNR
			PVPL	PVPL	PVPL	PVPL	AVJL	AVJL	AVJL	AVJL	AVJL	AVJL	AVJL	AVBL
			PVPR	PVPR	PVPR	PVPR	AVJR	AVJR	AVJR	AVJR	AVJR	AVJR	AVJR	AVBR		BDUR	BDUR	BDUR
			PVQL	PVQL	PVQL	PVQL	AVM	AVM	AVM	AVM	AVM	AVM	AVM	AVDL
			PVQR	PVQR	PVQR	PVQR	BDUL	BDUL	BDUL	BDUL	BDUL	BDUL	BDUL	AVDR
			RID	RID	RID	RID	BDUR	BDUR	BDUR	BDUR	BDUR	BDUR	BDUR	AVJL	AVM	AVM	AVM	AVM
			RIFL	RIFL	RIFL	RIFL	DVA	DVA	DVA	DVA	DVA	DVA	DVA	AVJR	PVNL
			RIFR	RIFR	RIFR	RIFR	PVCL	PVCL	PVCL	PVCL	PVCL	PVCL	PVCL	AVM		PVNL	PVNL	PVNL
			ADLR	ADLR	ADLR	ADLR	PVCR	PVCR	PVCR	PVCR	PVCR	PVCR	PVCR	BDUL
			HSNL	HSNL	HSNL	HSNL	PVNL	PVNL	PVNL	PVNL	PVNL	PVNL	PVNL	BDUR			AVDL	AVDL
			PVNR	PVNR	PVNR	PVNR	PVPL	PVPL	PVPL	PVPL	PVPL	PVPL	PVPL	PVCL		AVDL
			SIBVL	SIBVL	SIBVL	SIBVL	PVPR	PVPR	PVPR	PVPR	PVPR	PVPR	PVPR	PVCR		AVDR	AVDR	AVDR
							RID	RID	RID	RID	RID	RID	RID	PVNL	ALML
							PVNR	PVNR	PVNR	PVNR	PVNR	PVNR	PVNR	PVPL	AQR	RID	RID	RID
							RIFL	RIFL	RIFL	RIFL	RIFL	RIFL	RIFL	PVPR	AVBL
														RID	AVBR	RIFL	RIFL	RIFL
														PVNR	AVDL
														RIFL	AVDR	ALML	ALML	ALML
															AVJL
															AVJR	PVPL	PVPL	PVPL
															PVCL
															PVCR	AQR	AQR	AQR
															PVPL
															PVPR	PVPR	PVPR	PVPR
															RID
															RIFL		AVBL	AVBL
																AVBR
																AVJL	AVBR	AVBR
																AVJR
																PVCL	AVJL	AVJL
																PVCR
																AVBL	AVJR	AVJR
																	PVCL	PVCL
																	PVCR
																		PVCR
